# Supplementary material for: Mutperiod: Analysis of periodic mutation rates in nucleosomes
Source: PubMed Central journal article supplement (PMC8349767; doi:10.1016/j.csbj.2021.07.025), 2021-07-26
Supplement: mmc1.pdf [file mmc1.pdf]

## Supplemental Materials

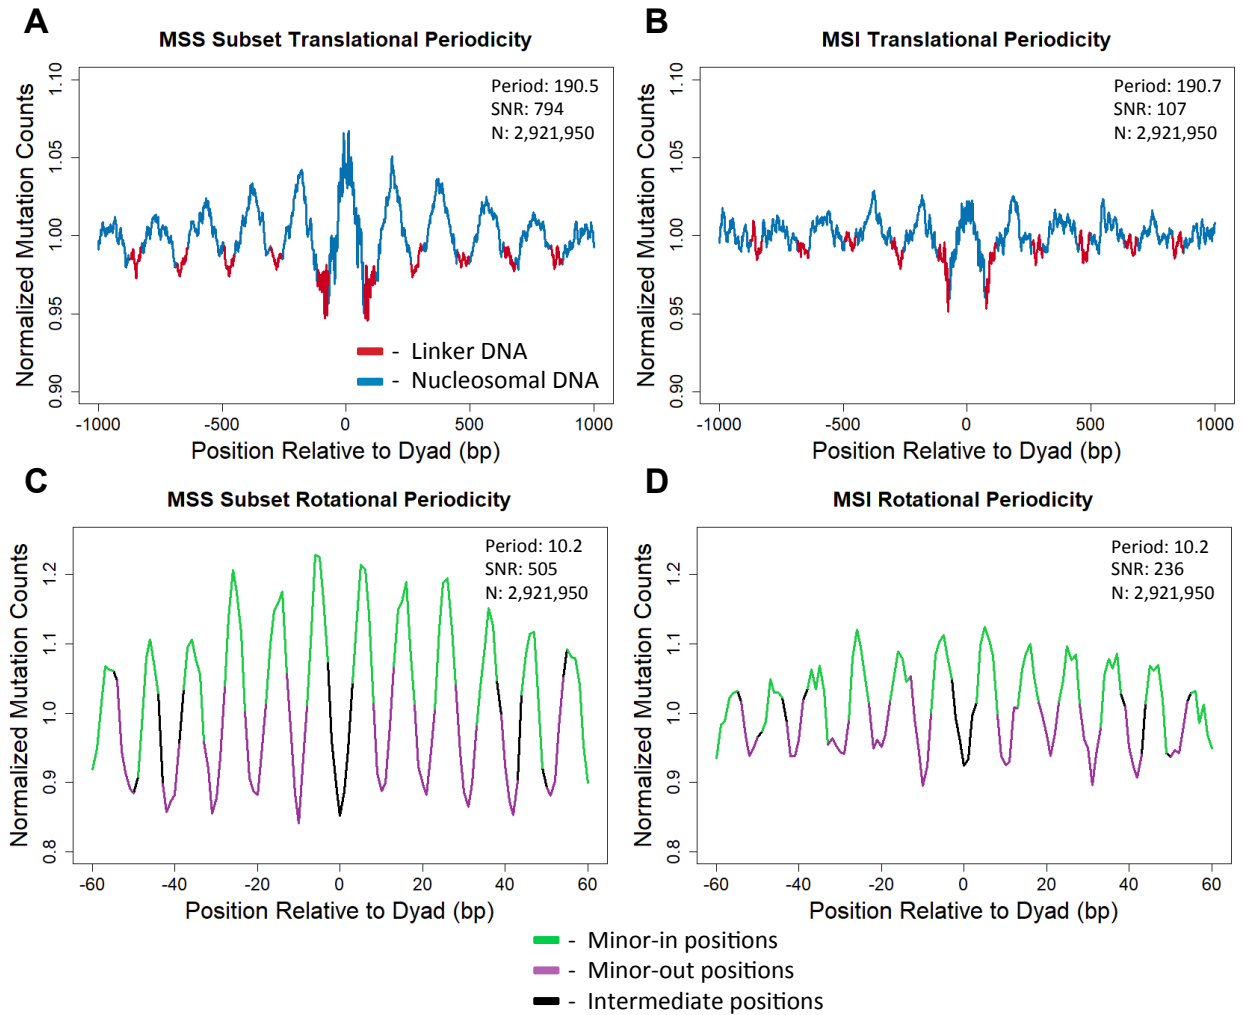

**Supplementary Figure S1: Differences in mutation counts between microsatellite stable and unstable tumors do not account for differences in periodicities.** The translational (A, B) and rotational (C, D) mutational periodicities for esophageal tumor mutation data. All values are normalized by trinucleotide sequence context. Plots A and C represent microsatellite stable (MSS) tumors while plots B and D represent microsatellite unstable (MSI) tumors. Mutations from MSS tumors were randomly sampled to be equal in number to those in MSI tumors. Translational data (A, B) is smoothed by averaging values in a sliding 11 bp window. SNR and Period values were computed prior to smoothing.

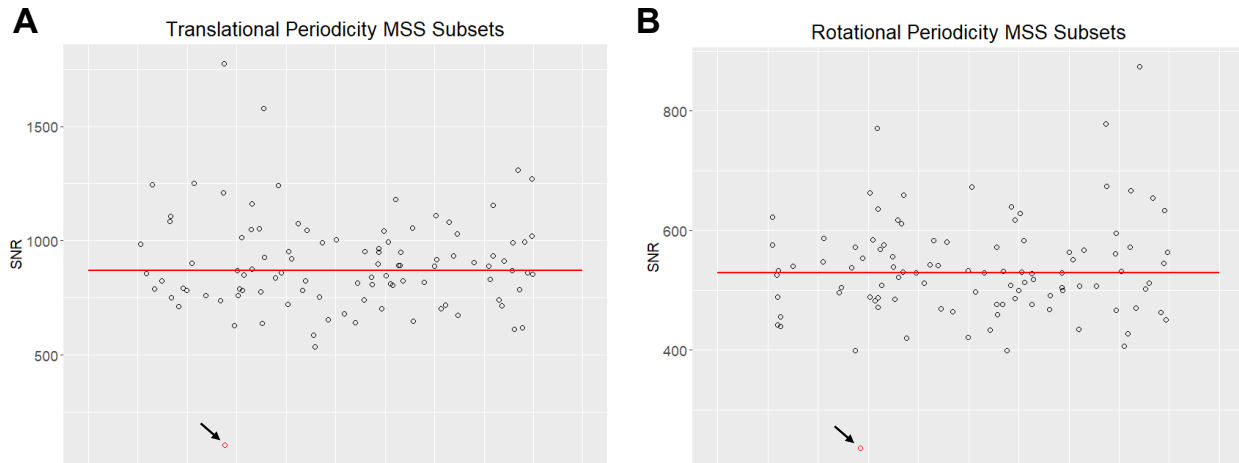

**Supplementary Figure S2: Distribution of SNRs for MSS Subsets.** Random subsets of the MSS data equal in size to the MSI data were taken and signal to noise ratios were calculated for translational (A) and rotational (B) periodicities. Red bars represent the median of each data set and the red points highlighted by the arrows represent the SNR for the MSI data.

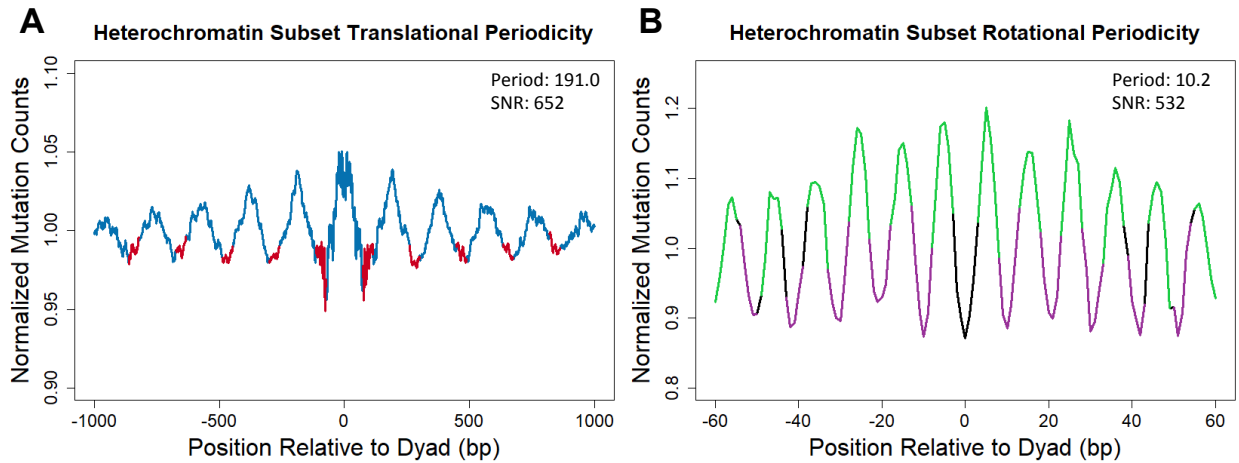

**Supplementary Figure S3: Subset of nucleosome map stratified by NHLF chromatin domains.** The translational (A) and rotational (B) mutational periodicities for esophageal tumor mutation data under a nucleosome map which is a subset of NHLF heterochromatin nucleosomes equal in size to the transcription nucleosome map ( $n = 2,277,747$ ). This data was generated in order to validate that the observed differences are not purely due to differences in the sizes between each map.

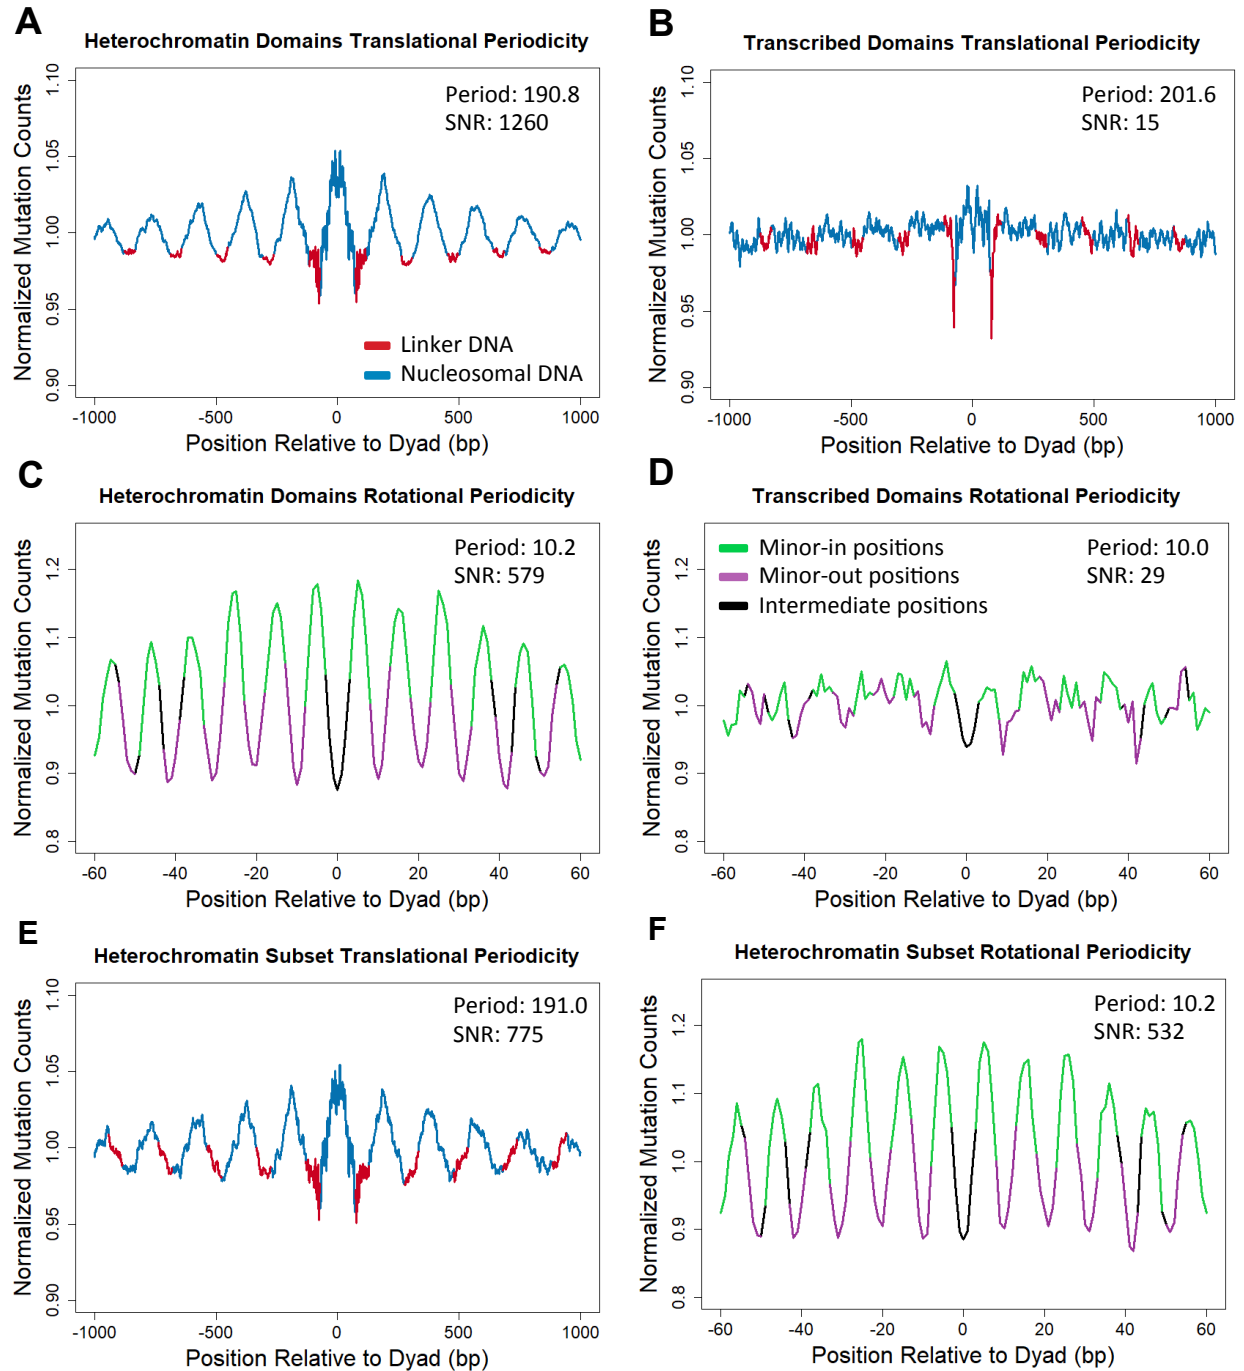

**Supplementary Figure S4: Analysis of mutation periodicities in nucleosome map stratified by GM12878 chromatin domains.** The translational (A, B, E) and rotational (C, D, F) mutational periodicities for esophageal tumor mutation data under different nucleosome map stratification conditions. All values are normalized by trinucleotide sequence context. Plots A and C were generated using a nucleosome map stratified by GM12878 heterochromatin domains while plots B and D use a map stratified by GM12878 transcribed domains. Plots E and F use a subset of heterochromatin nucleosomes equal in size to the transcription nucleosome map ( $n = 2,070,606$ ) in order to validate that the observed differences are not purely due to differences in

the sizes between each map. Translational data (**A**, **B**, **E**) is smoothed by averaging values in a sliding 11 bp window to reduce the visual clutter caused by rotational periodicity. SNR and Period values were computed prior to smoothing.

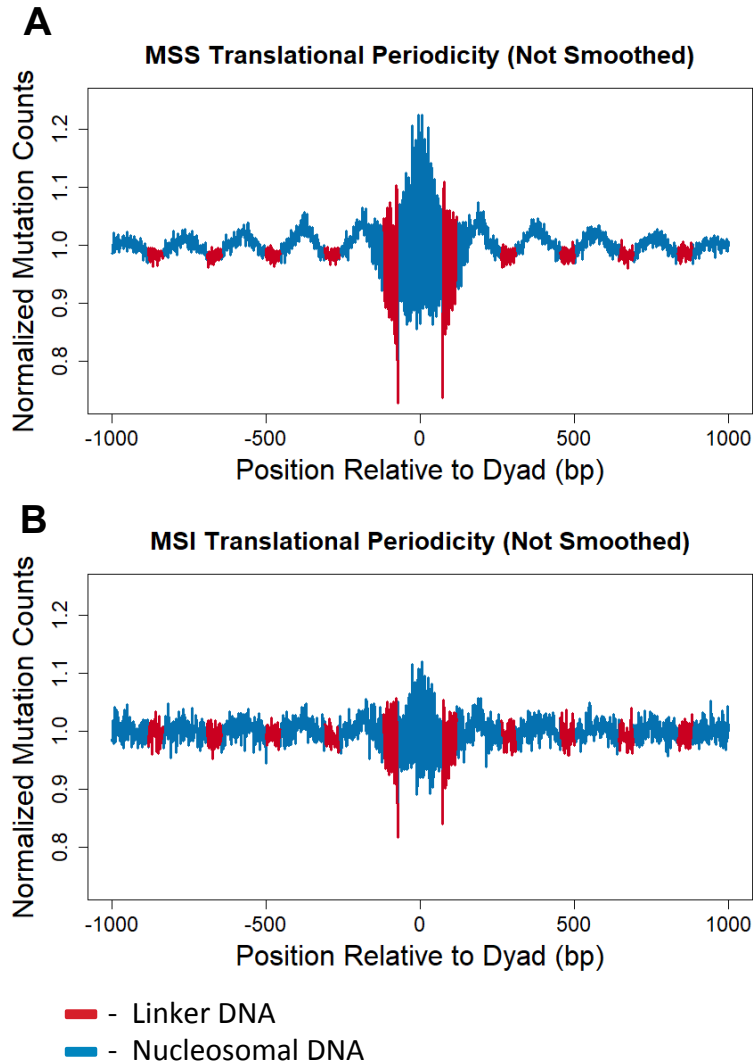

**Supplementary Figure S5: Unsmoothed translational periodicity data.** The translational periodicities for MSS (**A**) and MSI (**B**) esophageal tumor mutation data. All values are normalized by trinucleotide sequence context. The underlying data are identical to those in **Fig. 1A** and **1B**, except that no smoothing was applied prior to figure generation. Axes were expanded compared to **Fig. 1A** and **1B** in order to accommodate the larger range of normalized mutation counts.
